# Supplementary material
Source: PubMed Central journal article supplement (PMC4515142)
Supplement: NIHMS698168-supplement-Supp_MaterialS1.pdf [file NIHMS698168-supplement-Supp_MaterialS1.pdf]

**Supplementary Table 1. Effect size calculations and comparisons for CTA.**

**A. CTA Magnitude of the conditioned effect (i.e. compared to vehicle conditioning)**

| Experiment | Dose | Exp .History (Dose)         | <i>T-test</i>  |                  | <i>95% CI</i> |              | <i>Weighted Mean</i> | <i>X2</i>        |                |
|------------|------|-----------------------------|----------------|------------------|---------------|--------------|----------------------|------------------|----------------|
|            |      |                             | <i>p value</i> | <i>Cohen's d</i> | <i>lower</i>  | <i>upper</i> |                      | <i>Statistic</i> | <i>p value</i> |
| 1          | 0    | vs. VEH (2 g/kg)            | 0.000          | 2.080            | 0.914         | 3.246        |                      |                  |                |
| 2          | 0    | vs. VEH (1 g/kg)            | 0.197          | 0.636            | -0.370        | 1.642        | 0.858                | 1.657            | >0.05          |
| 3          | 0    | vs. VEH (2 g/kg + 3 mg/kg)  | 0.004          | 1.187            | 0.263         | 2.112        |                      |                  |                |
| 1          | 0    | vs. EtOH (2 g/kg)           | 0.158          | 0.678            | -0.301        | 1.656        |                      |                  |                |
| 2          | 0    | vs. EtOH (1 g/kg)           | 0.971          | 0.017            | -0.966        | 1.001        | 0.156                | 1.687            | >0.05          |
| 3          | 0    | vs. EtOH (2 g/kg + 3 mg/kg) | 0.799          | 0.125            | -0.830        | 1.079        |                      |                  |                |
| 1          | 0    | vs. CAFF (2 g/kg)           | 0.000          | 1.992            | 0.874         | 3.109        |                      |                  |                |
| 2          | 0    | vs. CAFF (1 g/kg)           | 0.081          | 0.872            | -0.153        | 1.897        | 1.072                | 0.711            | >0.05          |
| 3          | 0    | vs. CAFF (2 g/kg + 3 mg/kg) | 0.002          | 1.186            | 0.282         | 2.089        |                      |                  |                |
| 1          | 0    | vs. BOTH (2 g/kg)           | 0.012          | 1.312            | 0.269         | 2.356        |                      |                  |                |
| 2          | 0    | vs. BOTH (1 g/kg)           | 0.087          | 0.852            | -0.172        | 1.875        | 0.763                | 0.359            | >0.05          |
| 3          | 0    | vs. BOTH (2 g/kg + 3 mg/kg) | 0.195          | 0.613            | -0.333        | 1.560        |                      |                  |                |

**B. CTA Effect sizes: Differences according to exposure history**

| than 5.991 with 2 df |              |                     | <i>T-test</i>  |                  | <i>95% CI</i> |              | <i>Weighted Mean</i> | <i>X2</i>        |                |
|----------------------|--------------|---------------------|----------------|------------------|---------------|--------------|----------------------|------------------|----------------|
| Experiment           | Exp. History | Exp .History (Dose) | <i>p value</i> | <i>Cohen's d</i> | <i>lower</i>  | <i>upper</i> |                      | <i>Statistic</i> | <i>p value</i> |
| 1                    | VEH          | vs. EtOH            | 0.005          | 1.390            | 0.304         | 0.924        |                      |                  |                |
| 2                    | VEH          | vs. EtOH            | 0.224          | 0.624            | -0.451        | 1.575        | 0.838                | 0.437            | >0.05          |
| 3                    | VEH          | vs. EtOH            | 0.010          | 1.154            | 0.099         | 1.068        |                      |                  |                |
| 1                    | VEH          | vs. CAFF            | 0.728          | 0.162            | -0.793        | 1.731        |                      |                  |                |
| 2                    | VEH          | vs. CAFF            | 0.574          | 0.288            | -0.770        | 1.827        | 0.121                | 0.241            | >0.05          |
| 3                    | VEH          | vs. CAFF            | 0.906          | 0.050            | -0.808        | 1.636        |                      |                  |                |
| 1                    | VEH          | vs. BOTH            | 0.149          | 0.659            | -0.348        | 1.403        |                      |                  |                |
| 2                    | VEH          | vs. BOTH            | 0.633          | 0.243            | -0.813        | 1.863        | 0.434                | 0.295            | >0.05          |
| 3                    | VEH          | vs. BOTH            | 0.109          | 0.243            | -0.813        | 1.863        |                      |                  |                |
| 1                    | EtOH         | vs. CAFF            | 0.006          | 1.296            | 0.255         | 0.910        |                      |                  |                |
| 2                    | EtOH         | vs. CAFF            | 0.097          | 0.863            | -0.233        | 1.411        | 1.011                | 0.097            | >0.05          |
| 3                    | EtOH         | vs. CAFF            | 0.005          | 1.154            | 0.130         | 1.000        |                      |                  |                |
| 1                    | EtOH         | vs. BOTH            | 0.192          | 0.647            | -0.360        | 1.412        |                      |                  |                |
| 2                    | EtOH         | vs. BOTH            | 0.102          | 0.842            | -0.251        | 1.425        | 0.606                | 0.084            | >0.05          |
| 3                    | EtOH         | vs. BOTH            | 0.330          | 0.517            | -0.592        | 1.738        |                      |                  |                |
| 1                    | CAFF         | vs. BOTH            | 0.203          | 0.561            | -0.409        | 1.413        |                      |                  |                |
| 2                    | CAFF         | vs. BOTH            | 0.903          | 0.062            | -0.991        | 2.011        | 0.322                | 0.697            | >0.05          |
| 3                    | CAFF         | vs. BOTH            | 0.082          | 0.682            | -0.269        | 1.266        |                      |                  |                |

**Supplementary Table 2. Effect size calculations and comparisons for footslip measurements.**

**A. Footslip: Magnitude of the acute ataxic effects (i.e. the response compared to acute vehicle challenge)**

| Experiment | Dose | Exp .History (Dose)         | T-test  |           | 95% CI |       | Weighted Mean | X2 Statistic | p value |
|------------|------|-----------------------------|---------|-----------|--------|-------|---------------|--------------|---------|
|            |      |                             | p value | Cohen's d | lower  | upper |               |              |         |
| 1          | 0    | vs. VEH (2 g/kg)            | 0.001   | 2.102     | 0.911  | 3.534 |               |              |         |
| 2          | 0    | vs. VEH (3 g/kg)            | 0.002   | 1.560     | 0.596  | 2.655 | 2.114         | 0.581        | >0.05   |
| 3          | 0    | vs. VEH (2 g/kg + 3 mg/kg)  | 0.000   | 3.074     | 2.080  | 4.233 |               |              |         |
| 1          | 0    | vs. EtOH (2 g/kg)           | 0.000   | 3.650     | 2.187  | 5.505 |               |              |         |
| 2          | 0    | vs. EtOH (3 g/kg)           | 0.000   | 2.659     | 1.532  | 4.007 | 2.692         | 0.348        | >0.05   |
| 3          | 0    | vs. EtOH (2 g/kg + 3 mg/kg) | 0.000   | 2.563     | 1.662  | 3.596 |               |              |         |
| 1          | 0    | vs. CAFF (2 g/kg)           | 0.005   | 1.658     | 0.495  | 3.029 |               |              |         |
| 2          | 0    | vs. CAFF (3 g/kg)           | 0.005   | 1.344     | 0.402  | 2.399 | 2.436         | 1.283        | >0.05   |
| 3          | 0    | vs. CAFF (2 g/kg + 3 mg/kg) | 0.000   | 3.700     | 2.647  | 4.931 |               |              |         |
| 1          | 0    | vs. BOTH (2 g/kg)           | 0.003   | 1.709     | 0.578  | 3.038 |               |              |         |
| 2          | 0    | vs. BOTH (3 g/kg)           | 0.005   | 1.360     | 0.416  | 2.417 | 1.595         | 0.054        | >0.05   |
| 3          | 0    | vs. BOTH (2 g/kg + 3 mg/kg) | 0.000   | 1.729     | 0.958  | 2.584 |               |              |         |

**B. Footslip Effect Size Comparisons: Differences between exposure histories**

| Experiment | Exp. History | Exp .History | T-test  |           | 95% CI |       | Weighted Mean | X2 Statistic | p value |
|------------|--------------|--------------|---------|-----------|--------|-------|---------------|--------------|---------|
|            |              |              | p value | Cohen's d | lower  | upper |               |              |         |
| 1          | VEH          | vs. EtOH     | 0.007   | 1.452     | 0.388  | 2.673 |               |              |         |
| 2          | VEH          | vs. EtOH     | 0.377   | 0.408     | -0.565 | 1.422 | 0.700         | 1.431        | >0.05   |
| 3          | VEH          | vs. EtOH     | 0.004   | 1.292     | 0.398  | 2.283 |               |              |         |
| 1          | VEH          | vs. CAFF     | 0.533   | 0.312     | -0.769 | 1.431 |               |              |         |
| 2          | VEH          | vs. CAFF     | 0.522   | 0.294     | -0.680 | 1.297 | 0.378         | 0.068        | >0.05   |
| 3          | VEH          | vs. CAFF     | 0.214   | 0.498     | -0.316 | 1.346 |               |              |         |
| 1          | VEH          | vs. BOTH     | 0.022   | 1.215     | 0.140  | 2.431 |               |              |         |
| 2          | VEH          | vs. BOTH     | 0.038   | 1.014     | 0.019  | 2.109 | 1.082         | 0.021        | >0.05   |
| 3          | VEH          | vs. BOTH     | 0.011   | 1.072     | 0.233  | 1.984 |               |              |         |
| 1          | EtOH         | vs. CAFF     | 0.055   | 0.997     | -0.062 | 2.170 |               |              |         |
| 2          | EtOH         | vs. CAFF     | 0.203   | 0.596     | -0.379 | 1.631 | 0.872         | 1.300        | >0.05   |
| 3          | EtOH         | vs. CAFF     | 0.000   | 1.893     | 0.990  | 2.919 |               |              |         |
| 1          | EtOH         | vs. BOTH     | 0.6868  | 0.190     | -0.819 | 1.218 |               |              |         |
| 2          | EtOH         | vs. BOTH     | 0.008   | 1.364     | 0.340  | 2.524 | 0.151         | 9.759        | <0.01   |
| 3          | EtOH         | vs. BOTH     | 0.837   | 0.079     | -0.720 | 0.884 |               |              |         |
| 1          | CAFF         | vs. BOTH     | 0.124   | 0.801     | -0.285 | 1.987 |               |              |         |
| 2          | CAFF         | vs. BOTH     | 0.045   | 0.974     | -0.017 | 2.063 | 1.068         | 0.370        | >0.05   |
| 3          | CAFF         | vs. BOTH     | 0.000   | 1.630     | 0.790  | 2.567 |               |              |         |
